# Supplementary material for: Genetic Characterization of Some Saudi Arabia’s Accessions from Commiphora gileadensis Using Physio-Biochemical Parameters, Molecular Markers, DNA Barcoding Analysis and Relative Gene Expression
Source: MDPI journal article supplement (doi:10.3390/genes13112099), 2022-11-11
Supplement: s1 [file s1]

# Genetic Characterization of Some Saudi Arabia's Accessions from *Commiphora gileadensis* Using Physio-Biochemical Parameters, Molecular Markers, DNA Barcoding Analysis and Relative Gene Expression

Fatmah Ahmed Safhi <sup>1</sup>, Salha Mesfer ALshamrani <sup>2</sup>, Areej Saud Jalal <sup>1,\*</sup>,  
Diaa Abd El-Moneim <sup>3</sup>, Amal A. Alyamani <sup>4</sup> and Amira A. Ibrahim <sup>5</sup>

<sup>1</sup> Department of Biology, College of Science, Princess Nourah bint Abdulrahman University, P.O. Box 84428, Riyadh 11671, Saudi Arabia

<sup>2</sup> Department of Biology, College of Science, University of Jeddah, Jeddah 21959, Saudi Arabia

<sup>3</sup> Department of Plant Production, (Genetic Branch), Faculty of Environmental and Agricultural Sciences, Arish University, El-Arish 45511, Egypt

<sup>4</sup> Department of Biotechnology, Faculty of Science, Taif University, Taif 21974, Saudi Arabia

<sup>5</sup> Botany and Microbiology Department, Faculty of Science, Arish University, El-Arish 45511, Egypt

\* Correspondence: Asjalal@pnu.edu.sa

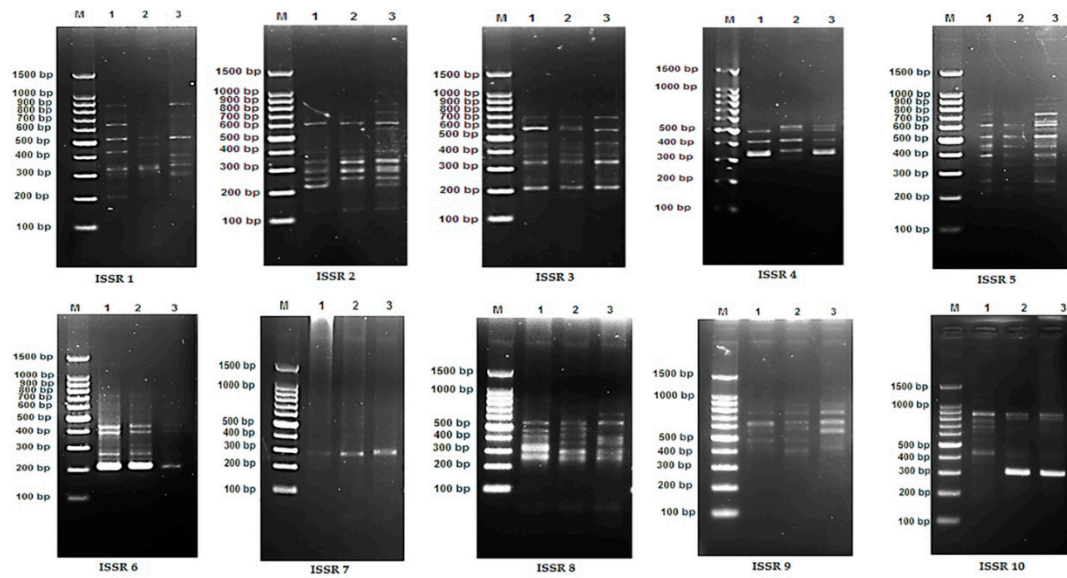

Figure S1. DNA profiles generated from ISSR marker for the *C. gileadensis* accessions in KSA.

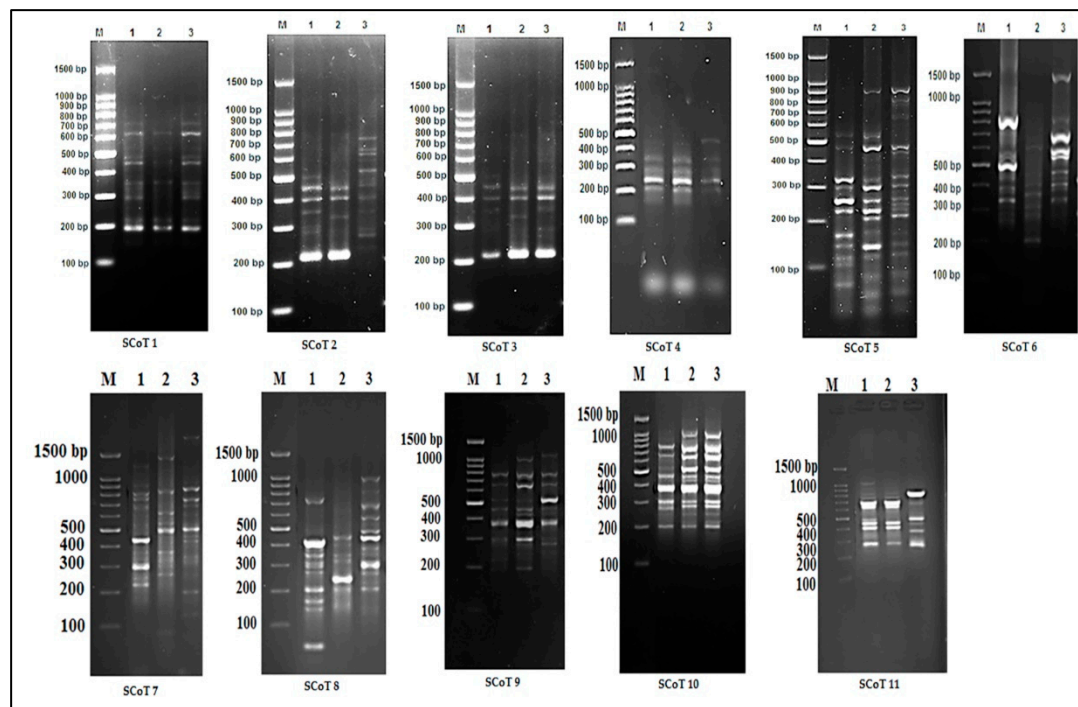

Figure S2. DNA profiles generated from SCoT marker for the *C. gileadensis* accessions in KSA.

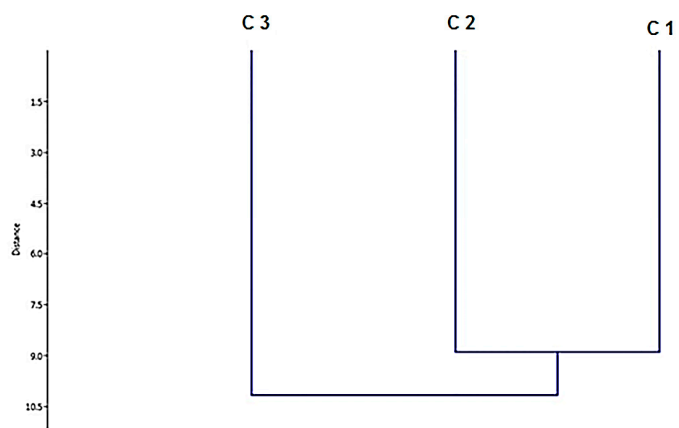

**Figure S3.** UPGAMA cluster for *C. gileadensis* accessions in KSA based on molecular markers (ISSR & SCoT).

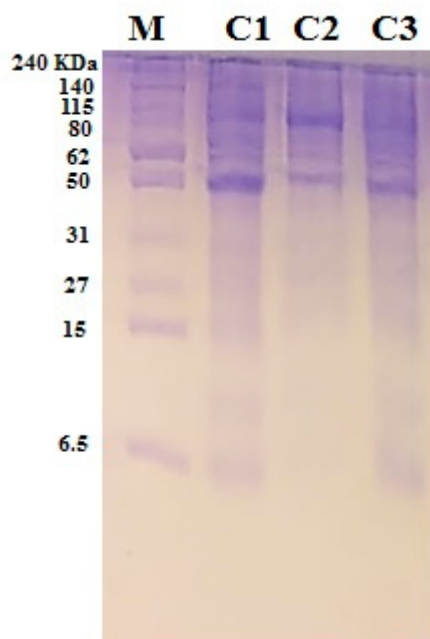

**Figure S4.** Protein profile of SDS-PAGE for *C. gileadensis* accessions in KSA.

**Table S1.** Code and locations of *Commiphora gileadensis* in KSA.

| Code | Taxa                                  | Location | Habitat            | GPS              |                  |
|------|---------------------------------------|----------|--------------------|------------------|------------------|
|      |                                       |          |                    | Latitude (N)     | Longitude E      |
| C1   | <i>Commiphora gileadensis</i>         | Jeddah   | High Salt tolerant | 21° 29' 33.0000" | 39° 10' 39.2520" |
| C2   | <i>Commiphora gileadensis</i>         | Jizan    | Low ssalt tolerant | 16° 53' 21.6924" | 42° 34' 14.0412" |
| C3   | Al-Baha <i>Commiphora gileadensis</i> | Riyadh   | Low salt tolerant  | 24° 42' 48.7872" | 46° 40' 31.0656" |

**Table S2.** Primer sequence used in real time PCR for gene expression.

| Primer           |   | Sequence                     |
|------------------|---|------------------------------|
| PAL 1            | F | 5'-ACAAATGGACATRTTAAT-3'     |
|                  | R | 5'-CTTCTATGAGATGTTGC-3'      |
| Defensin (PR-12) | F | 5'-CCAAATGCCTCGTCATCT-3'     |
|                  | R | 5'-ATTAGAGTCAAGCTCAAAAGG-3'  |
| AFPRT (PR1)      | F | 5'-ATGGAACACGACACTGGCAG-3'   |
|                  | R | 5'-GCATACTGACCAGAGTAACTGG-3' |
| β-Actin          | F | 5'-GTGCCCATTACGAAGGATA-3'    |
|                  | R | 5'-GAAGACTCCATGCCGATCAT-3'   |
